# Supplementary material for: TRAF6-Mediated Ubiquitin Signaling Drives Long-Term Neurodegeneration in a Mouse Model of Chronic Traumatic Encephalopathy
Source: Research Square preprint supplement (doi:10.21203/rs.3.rs-6652049/v1), 2025-05-26
Supplement: Supplementary file 1 [file 216b477d4138989d33fb34f8.xlsx]

## Sheet: Table 3
Table 3
Primer sequences
Gene	Forward sequences (5' → 3')	Reverse sequences (5' → 3')
Mapt	GAATGTCAGGTCGAAGATTGGC	TGGACTGGACGTTGCTAAGAT
Aif1	ATCAACAAGCAATTCCTCGATGA	CAGCATTCGCTTCAAGGACATA
Tardbp	ACTTCCCAACTCTAAGCAAAGC	AAGGCAAAAGCTCTGAATGGT
Gfap	CGGAGACGCATCACCTCTG	TGGAGGAGTCATTCGAGACAA
Traf6	ATTTCATTGTCAACTGGGCA	TGAGTGTCCCATCTGCTTGA
Tlr4	TAACATCCTTTTCCTTCATCATTCT	TCAACTATTTAAAGCCCTATCACAA
Tlr9	CTGAACTTGAGCTATAATGGTATCA	GTTGTTATACTTCAGAGACAGATGG
Myd88	AGGACAAACGCCGGAACTTTT	GCCGATAGTCTGTCTGTTCTAGT
Stub1	GATGATATTCCTAGTGCCCTTC	CATCCATATCTGCCATGTATTTATC
Ube2n	AATCCAGGCTTTGTTAAGTGCT	CTTCGTTGGTCTTCCATTGCT
Nfkb1	ATGGCAGACGATGATCCCTAC	TGTTGACAGTGGTATTTCTGGTG
Cxcl1	CTGGGATTCACCTCAAGAACATC	CAGGGTCAAGGCAAGCCTC
Il6	TCTATACCACTTCACAAGTCGGA	GAATTGCCATTGCACAACTCTTT
Nos2	GGAGTGACGGCAAACATGACT	TCGATGCACAACTGGGTGAAC
Gapdh	CATTGGGGGTAGGAACACGGA	GCCAAAAGGGTCATCATCTCCG
