# Supplementary material for: TRAF6-Mediated Ubiquitin Signaling Drives Long-Term Neurodegeneration in a Mouse Model of Chronic Traumatic Encephalopathy
Source: Research Square preprint supplement (doi:10.21203/rs.3.rs-6652049/v1), 2025-05-26
Supplement: Supplementary file 2 [file d5c4b4a5d93102c2b5e15293.xlsx]

## Sheet: Table 1
Table 1
Upregulated and downregulated miRNAs in the heat-map
	Upregulated miRNAs				Downregulated miRNAs
	miRNAs ID	Log2(FC)	p Value		miRNAs ID	Log2(FC)	p Value
SHAM vs KD	mmu-miR-7a-5p	4.37645	0.0155271		mmu-miR-7070-5p	-3.59378	0.0100822
	mmu-miR-351-5p	3.79868	0.015173		mmu-miR-196a-5p	-4.3185	0.00475851
	mmu-miR-15a-5p	4.74565	0.0411774		mmu-miR-574-3p	-1.59323	0.0481873
	mmu-miR-1839-5p	3.63153	7.3075		mmu-miR-8101	-4.55251	0.0205223
	mmu-miR-130b-3p	2.09634	0.034685		mmu-miR-320-3p	-3.07819	0.0186628
					mmu-miR-615-5p	-7.89211	0.00124862
					mmu-miR-145a-5p	-3.80449	0.000211508
	Upregulated miRNAs				Downregulated miRNAs
	miRNAs ID	Log2(FC)	p Value		miRNAs ID	Log2(FC)	p Value
SHAM vs TBI	mmu-miR-3535	4.90395	0.000190017		mmu-miR-434-5p	-4.14657	0.0114133
	mmu-miR-301a-3p	3.91194	0.000611614		mmu-miR-6967-3p	-4.75007	0.0101933
	mmu-miR-351-5p	3.21713	0.00949801		mmu-miR-676-5p	-5.10972	0.0328328
	mmu-miR-7a-5p	4.50229	0.00416933		mmu-miR-122-5p	-1.49717	0.0303999
	mmu-miR-133a-5p	4.26642	0.00832724		mmu-miR-409-3p	-3.0374	0.0357609
					mmu-miR-467f	-2.8681	0.0452877
					mmu-miR-1249-3p	-2.92115	0.0393221
					mmu-miR-434-3p	-2.93682	0.0388001
					mmu-miR-667-3p	-3.28261	0.03896
					mmu-miR-205-5p	-1.71459	0.0314626
					mmu-miR-92b-3p	-2.21567	0.0350061
					mmu-miR-574-3p	-1.46839	0.0238713
	Upregulated miRNAs				Downregulated miRNAs
	miRNAs ID	Log2(FC)	p Value		miRNAs ID	Log2(FC)	p Value
SHAM vs KD TBI	mmu-miR-328-5p	4.03146	0.020908		mmu-miR-451a	-1.86664	0.0093758
	mmu-miR-7a-5p	3.31296	0.0283551		mmu-miR-10b-3p	-5.29493	0.0110095
	mmu-miR-351-5p	3.41716	0.00896876		mmu-miR-382-5p	-3.34948	0.0339621
	Upregulated miRNAs				Downregulated miRNAs
	miRNAs ID	Log2(FC)	p Value		miRNAs ID	Log2(FC)	p Value
KD TBI vs KD	mmu-let-7i-5p	1.81595	0.0185839		mmu-miR-8108	-2.89136	0.0266587
	mmu-miR-17-5p	1.8134	0.0338863		mmu-miR-335-5p	-2.28147	0.0482054
	mmu-miR-93-5p	1.60534	0.0376111		mmu-miR-7025-3p	-4.77967	0.0393147
	mmu-miR-382-5p	3.3096	0.0429015		mmu-miR-196a-5p	-2.9409	0.0144711
	mmu-miR-16-2-3p	4.60531	0.0197177		mmu-miR-1895	-1.91552	0.0401927
	mmu-miR-451a	2.64532	0.000348311		mmu-miR-615-5p	-4.84174	0.0038696
	mmu-miR-142a-5p	1.62677	0.0316449		mmu-miR-7070-5p	-2.74399	0.00912968
	mmu-miR-7687-3p	6.99905	0.028941		mmu-miR-145a-5p	-4.10336	0.000117867
					mmu-let-7e-5p	-1.73393	0.0409058
					mmu-miR-23a-3p	-1.57558	0.0422345
	Upregulated miRNAs				Downregulated miRNAs
	miRNAs ID	Log2(FC)	p Value		miRNAs ID	Log2(FC)	p Value
KD TBI vs TBI	mmu-miR-451a	1.2423	0.0129376		mmu-miR-122-5p	-1.24025	0.048568
	mmu-miR-16-2-3p	3.03394	0.00885805		mmu-miR-8117	-5.02236	0.0336087
	mmu-miR-196a-5p	3.66654	0.00242753		mmu-miR-150-5p	-1.18382	0.0138329
	mmu-miR-10b-3p	5.88006	0.00260913		mmu-miR-8114	-1.95721	0.0386609
	mmu-miR-7687-3p	4.21497	0.0233535		mmu-miR-466m-3p	-2.81496	0.0205062
	mmu-miR-19b-3p	1.20309	0.0359629		mmu-miR-467f	-3.22012	0.00856134
	mmu-miR-1839-3p	2.27437	0.0353839		mmu-miR-744-3p	-2.19384	0.0497568
	mmu-miR-3535	2.79736	0.00275445		mmu-miR-423-3p	-1.58702	0.0101503
	mmu-miR-301a-3p	3.70706	8.6055e-05		mmu-miR-125a-5p	-7.89211	0.00365449
	mmu-miR-144-5p	1.73238	0.0260317
	mmu-miR-199b-5p	1.46628	0.0322417
	mmu-miR-144-3p	1.85726	0.00724249
	mmu-miR-196b-3p	3.41049	0.0284568
