# Supplementary material for: TRAF6-Mediated Ubiquitin Signaling Drives Long-Term Neurodegeneration in a Mouse Model of Chronic Traumatic Encephalopathy
Source: Research Square preprint supplement (doi:10.21203/rs.3.rs-6652049/v1), 2025-05-26
Supplement: Supplementary file 3 [file d74fbcfbd4e83d4a1cfc46b6.xlsx]

## Sheet: Table 2
Table 2
Antibodies
Antibody	Supplier	Identifier
NEUN Polyclonal antibody	Proteintech	26975-1-AP
Phospho-TAU (Ser202, Thr205) Monoclonal Antibody (AT8)	Invitrogen	MN1020B
IBA1 antibody (1022-5)	Santacruz Biotechnology	SC-32725
Phospho-TDP43 (Ser409/410) Recombinant antibody	Proteintech	80007-1-RR
TRAF6 Antibody (D-10)	Santacruz Biotechnology	SC-8409
GAPDH (D16H11) XP® Rabbit mAb	Cell Signling Technoolgy	5174
GFP antibody (B-2)	Santacruz Biotechnology	sc-9996
Purified anti-Neurofilament Marker (pan axonal, cocktail) Antibody	Biolegend	837904
Ub-K63 Monoclonal Antibody (HWA4C4)	Invitrogen	14-6077-82
Ub-K48 Recombinant Rabbit Monoclonal Antibody (ARC0811)	Invitrogen	MA5-35382
CHIP/STUB1 antibody	Santacruz Biotechnology	SC-133066
β-TUBULIN antibody (D-10)	Santacruz Biotechnology	SC-5274
Goat anti-Mouse IgG (H+L) Cross-Adsorbed Secondary Antibody Alexa Fluor™ 350	Invitrogen	A-11045
Goat anti-Rabbit IgG (H+L) Cross-Adsorbed Secondary Antibody Alexa Fluor™ 350	Invitrogen	A-11046
Goat anti-Mouse IgG (H+L) Cross-Adsorbed Secondary Antibody, Alexa Fluor 568	Invitrogen	A-11004
Goat anti-Rabbit IgG (H+L) Cross-Adsorbed Secondary Antibody, Alexa Fluor 488	Invitrogen	A-11008
Goat anti-Mouse IgG (H+L) Superclonal™ Secondary Antibody, Alexa Fluor™ 488	Invitrogen	A-28175
Goat anti-Rabbit IgG (H+L) Cross-Adsorbed Secondary Antibody, Alexa Fluor™ 568	Invitrogen	A-11011
Goat Anti-Mouse IgG (H + L)-HRP Conjugate	Bio-Rad Laboratories	1706516
Goat Anti-Rabbit IgG (H + L)-HRP Conjugate	Bio-Rad Laboratories	1706515
